# Supplementary material for: A structural and magnetic study of organolanthanide(iii) amides
Source: Royal Society of Chemistry journal article supplement (doi:10.1039/b514470a), 2005-12-14
Supplement: b514470a.pdf [file b514470a.pdf]

Expression for the magnetic susceptibility of complex **2**

$$\chi = \frac{Ng^2\beta^2}{3kT} \cdot \frac{840e^{-24.5J/kT} + 546e^{-10.5J/kT} + 330e^{+1.5J/kT} + 180e^{+11.5J/kT} + 84e^{+19.5J/kT} + 30e^{+25.5J/kT} + 6e^{+29.5J/kT}}{15e^{-24.5J/kT} + 13e^{-10.5J/kT} + 11e^{+1.5J/kT} + 9e^{+11.5J/kT} + 7e^{+19.5J/kT} + 5e^{+25.5J/kT} + 3e^{+29.5J/kT} + 1e^{+31.5J/kT}} \quad \text{Eqn. (5)}$$
